# Supplementary material for: Analysis of the canid Y-chromosome phylogeny using short-read sequencing data reveals the presence of distinct haplogroups among Neolithic European dogs
Source: PubMed Central journal article supplement (PMC5946424; doi:10.1186/s12864-018-4749-z), 2018-05-10

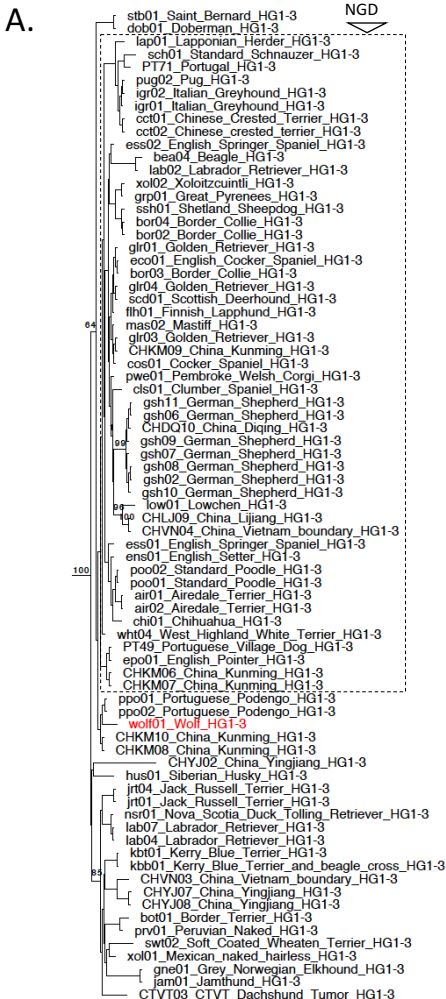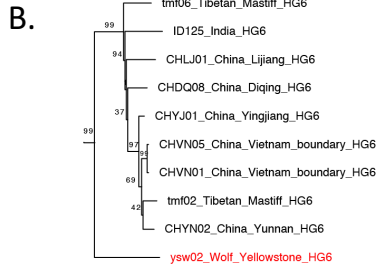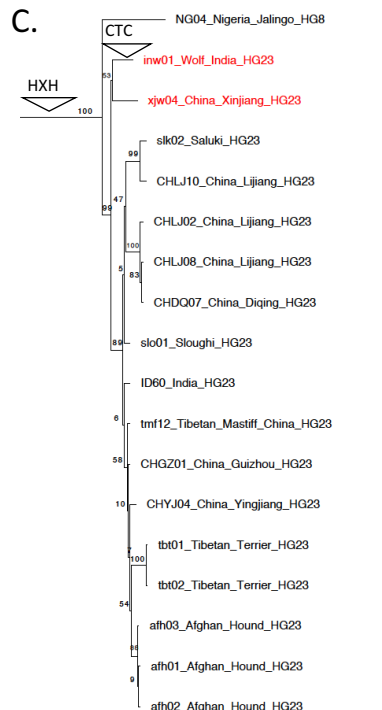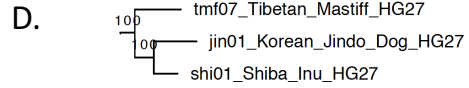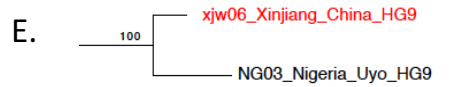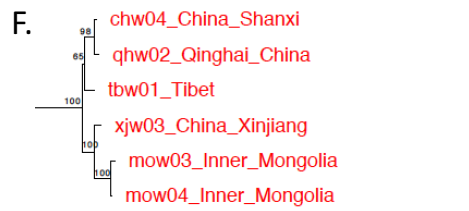

Supplement: 12864_2018_4749_MOESM6_ESM.pdf [file 12864_2018_4749_MOESM6_ESM.pdf]
