# Supplementary material for: Analysis of the canid Y-chromosome phylogeny using short-read sequencing data reveals the presence of distinct haplogroups among Neolithic European dogs
Source: PubMed Central journal article supplement (PMC5946424; doi:10.1186/s12864-018-4749-z), 2018-05-10
Supplement: 12864_2018_4749_MOESM7_ESM.pdf [file 12864_2018_4749_MOESM7_ESM.pdf]

K=2

K=3

K=4

K=5

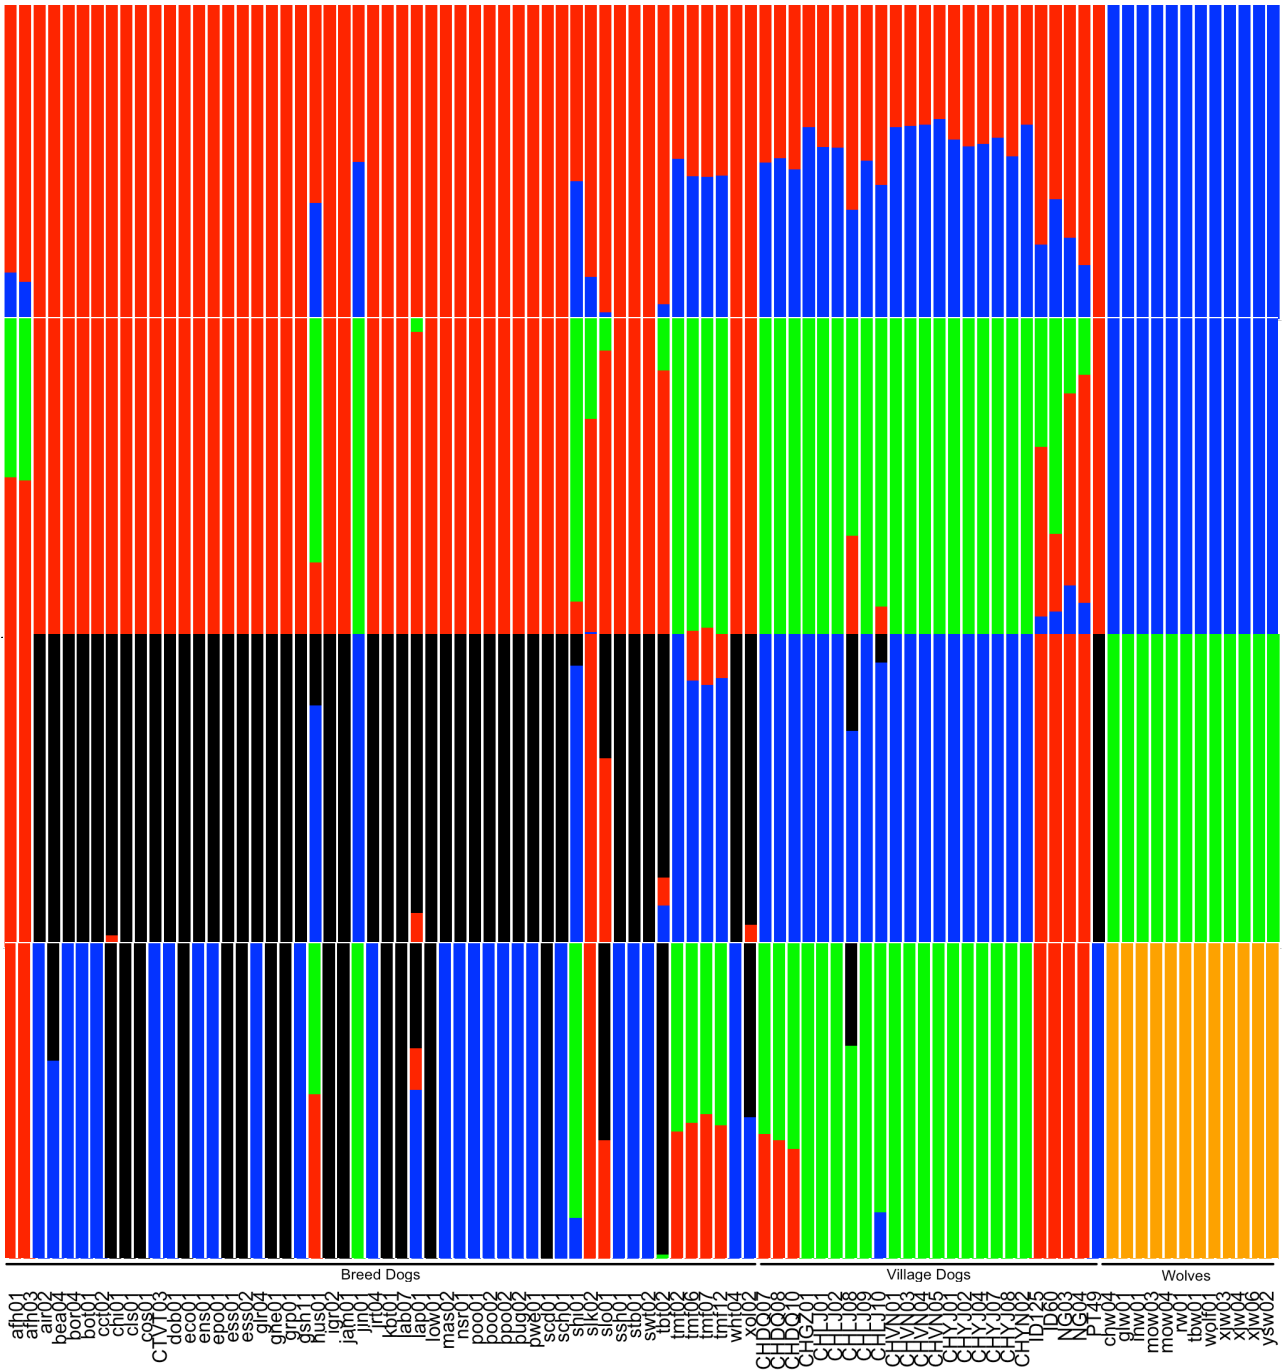

Breed Dogs

Village Dogs

Wolves

aff01  
 aff02  
 bea01  
 boi01  
 boi02  
 cla01  
 cla02  
 C101  
 C102  
 C103  
 C104  
 C105  
 C106  
 C107  
 C108  
 C109  
 C110  
 C111  
 C112  
 C113  
 C114  
 C115  
 C116  
 C117  
 C118  
 C119  
 C120  
 C121  
 C122  
 C123  
 C124  
 C125  
 C126  
 C127  
 C128  
 C129  
 C130  
 C131  
 C132  
 C133  
 C134  
 C135  
 C136  
 C137  
 C138  
 C139  
 C140  
 C141  
 C142  
 C143  
 C144  
 C145  
 C146  
 C147  
 C148  
 C149  
 C150  
 C151  
 C152  
 C153  
 C154  
 C155  
 C156  
 C157  
 C158  
 C159  
 C160  
 C161  
 C162  
 C163  
 C164  
 C165  
 C166  
 C167  
 C168  
 C169  
 C170  
 C171  
 C172  
 C173  
 C174  
 C175  
 C176  
 C177  
 C178  
 C179  
 C180  
 C181  
 C182  
 C183  
 C184  
 C185  
 C186  
 C187  
 C188  
 C189  
 C190  
 C191  
 C192  
 C193  
 C194  
 C195  
 C196  
 C197  
 C198  
 C199  
 C200  
 C201  
 C202  
 C203  
 C204  
 C205  
 C206  
 C207  
 C208  
 C209  
 C210  
 C211  
 C212  
 C213  
 C214  
 C215  
 C216  
 C217  
 C218  
 C219  
 C220  
 C221  
 C222  
 C223  
 C224  
 C225  
 C226  
 C227  
 C228  
 C229  
 C230  
 C231  
 C232  
 C233  
 C234  
 C235  
 C236  
 C237  
 C238  
 C239  
 C240  
 C241  
 C242  
 C243  
 C244  
 C245  
 C246  
 C247  
 C248  
 C249  
 C250  
 C251  
 C252  
 C253  
 C254  
 C255  
 C256  
 C257  
 C258  
 C259  
 C260  
 C261  
 C262  
 C263  
 C264  
 C265  
 C266  
 C267  
 C268  
 C269  
 C270  
 C271  
 C272  
 C273  
 C274  
 C275  
 C276  
 C277  
 C278  
 C279  
 C280  
 C281  
 C282  
 C283  
 C284  
 C285  
 C286  
 C287  
 C288  
 C289  
 C290  
 C291  
 C292  
 C293  
 C294  
 C295  
 C296  
 C297  
 C298  
 C299  
 C300  
 C301  
 C302  
 C303  
 C304  
 C305  
 C306  
 C307  
 C308  
 C309  
 C310  
 C311  
 C312  
 C313  
 C314  
 C315  
 C316  
 C317  
 C318  
 C319  
 C320  
 C321  
 C322  
 C323  
 C324  
 C325  
 C326  
 C327  
 C328  
 C329  
 C330  
 C331  
 C332  
 C333  
 C334  
 C335  
 C336  
 C337  
 C338  
 C339  
 C340  
 C341  
 C342  
 C343  
 C344  
 C345  
 C346  
 C347  
 C348  
 C349  
 C350  
 C351  
 C352  
 C353  
 C354  
 C355  
 C356  
 C357  
 C358  
 C359  
 C360  
 C361  
 C362  
 C363  
 C364  
 C365  
 C366  
 C367  
 C368  
 C369  
 C370  
 C371  
 C372  
 C373  
 C374  
 C375  
 C376  
 C377  
 C378  
 C379  
 C380  
 C381  
 C382  
 C383  
 C384  
 C385  
 C386  
 C387  
 C388  
 C389  
 C390  
 C391  
 C392  
 C393  
 C394  
 C395  
 C396  
 C397  
 C398  
 C399  
 C400  
 C401  
 C402  
 C403  
 C404  
 C405  
 C406  
 C407  
 C408  
 C409  
 C410  
 C411  
 C412  
 C413  
 C414  
 C415  
 C416  
 C417  
 C418  
 C419  
 C420  
 C421  
 C422  
 C423  
 C424  
 C425  
 C426  
 C427  
 C428  
 C429  
 C430  
 C431  
 C432  
 C433  
 C434  
 C435  
 C436  
 C437  
 C438  
 C439  
 C440  
 C441  
 C442  
 C443  
 C444  
 C445  
 C446  
 C447  
 C448  
 C449  
 C450  
 C451  
 C452  
 C453  
 C454  
 C455  
 C456  
 C457  
 C458  
 C459  
 C460  
 C461  
 C462  
 C463  
 C464  
 C465  
 C466  
 C467  
 C468  
 C469  
 C470  
 C471  
 C472  
 C473  
 C474  
 C475  
 C476  
 C477  
 C478  
 C479  
 C480  
 C481  
 C482  
 C483  
 C484  
 C485  
 C486  
 C487  
 C488  
 C489  
 C490  
 C491  
 C492  
 C493  
 C494  
 C495  
 C496  
 C497  
 C498  
 C499  
 C500  
 C501  
 C502  
 C503  
 C504  
 C505  
 C506  
 C507  
 C508  
 C509  
 C510  
 C511  
 C512  
 C513  
 C514  
 C515  
 C516  
 C517  
 C518  
 C519  
 C520  
 C521  
 C522  
 C523  
 C524  
 C525  
 C526  
 C527  
 C528  
 C529  
 C530  
 C531  
 C532  
 C533  
 C534  
 C535  
 C536  
 C537  
 C538  
 C539  
 C540  
 C541  
 C542  
 C543  
 C544  
 C545  
 C546  
 C547  
 C548  
 C549  
 C550  
 C551  
 C552  
 C553  
 C554  
 C555  
 C556  
 C557  
 C558  
 C559  
 C560  
 C561  
 C562  
 C563  
 C564  
 C565  
 C566  
 C567  
 C568  
 C569  
 C570  
 C571  
 C572  
 C573  
 C574  
 C575  
 C576  
 C577  
 C578  
 C579  
 C580  
 C581  
 C582  
 C583  
 C584  
 C585  
 C586  
 C587  
 C588  
 C589  
 C590  
 C591  
 C592  
 C593  
 C594  
 C595  
 C596  
 C597  
 C598  
 C599  
 C600  
 C601  
 C602  
 C603  
 C604  
 C605  
 C606  
 C607  
 C608  
 C609  
 C610  
 C611  
 C612  
 C613  
 C614  
 C615  
 C616  
 C617  
 C618  
 C619  
 C620  
 C621  
 C622  
 C623  
 C624  
 C625  
 C626  
 C627  
 C628  
 C629  
 C630  
 C631  
 C632  
 C633  
 C634  
 C635  
 C636  
 C637  
 C638  
 C639  
 C640  
 C641  
 C642  
 C643  
 C644  
 C645  
 C646  
 C647  
 C648  
 C649  
 C650  
 C651  
 C652  
 C653  
 C654  
 C655  
 C656  
 C657  
 C658  
 C659  
 C660  
 C661  
 C662  
 C663  
 C664  
 C665  
 C666  
 C667  
 C668  
 C669  
 C670  
 C671  
 C672  
 C673  
 C674  
 C675  
 C676  
 C677  
 C678  
 C679  
 C680  
 C681  
 C682  
 C683  
 C684  
 C685  
 C686  
 C687  
 C688  
 C689  
 C690  
 C691  
 C692  
 C693  
 C694  
 C695  
 C696  
 C697  
 C698  
 C699  
 C700  
 C701  
 C702  
 C703  
 C704  
 C705  
 C706  
 C707  
 C708  
 C709  
 C710  
 C711  
 C712  
 C713  
 C714  
 C715  
 C716  
 C717  
 C718  
 C719  
 C720  
 C721  
 C722  
 C723  
 C724  
 C725  
 C726  
 C727  
 C728  
 C729  
 C730  
 C731  
 C732  
 C733  
 C734  
 C735  
 C736  
 C737  
 C738  
 C739  
 C740  
 C741  
 C742  
 C743  
 C744  
 C745  
 C746  
 C747  
 C748  
 C749  
 C750  
 C751  
 C752  
 C753  
 C754  
 C755  
 C756  
 C757  
 C758  
 C759  
 C760  
 C761  
 C762  
 C763  
 C764  
 C765  
 C766  
 C767  
 C768  
 C769  
 C770  
 C771  
 C772  
 C773  
 C774  
 C775  
 C776  
 C777  
 C778  
 C779  
 C780  
 C781  
 C782  
 C783  
 C784  
 C785  
 C786  
 C787  
 C788  
 C789  
 C790  
 C791  
 C792  
 C793  
 C794  
 C795  
 C796  
 C797  
 C798  
 C799  
 C800  
 C801  
 C802  
 C803  
 C804  
 C805  
 C806  
 C807  
 C808  
 C809  
 C810  
 C811  
 C812  
 C813  
 C814  
 C815  
 C816  
 C817  
 C818  
 C819  
 C820  
 C821  
 C822  
 C823  
 C824  
 C825  
 C826  
 C827  
 C828  
 C829  
 C830  
 C831  
 C832  
 C833  
 C834  
 C835  
 C836  
 C837  
 C838  
 C839  
 C840  
 C841  
 C842  
 C843  
 C844  
 C845  
 C846  
 C847  
 C848  
 C849  
 C850  
 C851  
 C852  
 C853  
 C854  
 C855  
 C856  
 C857  
 C858  
 C859  
 C860  
 C861  
 C862  
 C863  
 C864  
 C865  
 C866  
 C867  
 C868  
 C869  
 C870  
 C871  
 C872  
 C873  
 C874  
 C875  
 C876  
 C877  
 C878  
 C879  
 C880  
 C881  
 C882  
 C883  
 C884  
 C885  
 C886  
 C887  
 C888  
 C889  
 C890  
 C891  
 C892  
 C893  
 C894  
 C895  
 C896  
 C897  
 C898  
 C899  
 C900  
 C901  
 C902  
 C903  
 C904  
 C905  
 C906  
 C907  
 C908  
 C909  
 C910  
 C911  
 C912  
 C913  
 C914  
 C915  
 C916  
 C917  
 C918  
 C919  
 C920  
 C921  
 C922  
 C923  
 C924  
 C925  
 C926  
 C927  
 C928  
 C929  
 C930  
 C931  
 C932  
 C933  
 C934  
 C935  
 C936  
 C937  
 C938  
 C939  
 C940  
 C941  
 C942  
 C943  
 C944  
 C945  
 C946  
 C947  
 C948  
 C949  
 C950  
 C951  
 C952  
 C953  
 C954  
 C955  
 C956  
 C957  
 C958  
 C959  
 C960  
 C961  
 C962  
 C963  
 C964  
 C965  
 C966  
 C967  
 C968  
 C969  
 C970  
 C971  
 C972  
 C973  
 C974  
 C975  
 C976  
 C977  
 C978  
 C979  
 C980  
 C981  
 C982  
 C983  
 C984  
 C985  
 C986  
 C987  
 C988  
 C989  
 C990  
 C991  
 C992  
 C993  
 C994  
 C995  
 C996  
 C997  
 C998  
 C999  
 C1000
