# Supplementary material for: Analysis of the canid Y-chromosome phylogeny using short-read sequencing data reveals the presence of distinct haplogroups among Neolithic European dogs
Source: BMC Genomics. 2018 May 10;19:350. doi: 10.1186/s12864-018-4749-z (PMC5946424; doi:10.1186/s12864-018-4749-z)
Supplement: Supplementary file 2 — Table S2. Summary of positions passing quality filters. (PDF 102 kb) [file 12864_2018_4749_MOESM2_ESM.pdf]

**Table S2** Summary of positions passing quality filters

| <b>Filter</b>             | <b>Passing<br/>Sites</b> | <b>Description</b>                                                                   |
|---------------------------|--------------------------|--------------------------------------------------------------------------------------|
| Positions in<br>Reference | 2,460,580                | unfiltered sequence                                                                  |
| Regional<br>Filtering     | 868,575                  | sites passing depth and MQ0 Ratio Filters                                            |
| Site-Level<br>Filtering   | 497,722                  | site-level filtering of heterozygote, MQ0 Ratio, and sites with<br>missing genotypes |
| Second Depth              | 488,818                  | positions with extreme depth values                                                  |
| Indel Filter              | 484,924                  | +/- 5bp from indels                                                                  |
