# Supplementary material for: Analysis of the canid Y-chromosome phylogeny using short-read sequencing data reveals the presence of distinct haplogroups among Neolithic European dogs
Source: BMC Genomics. 2018 May 10;19:350. doi: 10.1186/s12864-018-4749-z (PMC5946424; doi:10.1186/s12864-018-4749-z)
Supplement: Supplementary file 3 — Figure S1. Structure and annotation of the dog Y-chromosome (KP081776.1) amplicon region (chrY:1,200,000–2,440,580) A self-alignment of the dog Y-chromosome amplicon sequence for visualization of palindrome repeat sequences is presented (A). The three repeat families are color coded in purple, pink, and blue. The annotated sequence with amplicon genes (black) is represented as a UCSC browser track (B). Individual palindrome arms are numbered while palindrome spacers are lettered. (PDF 2240 kb) [file 12864_2018_4749_MOESM3_ESM.pdf]

The figure shows a square lattice with a diagonal line and a cluster of squares. The lattice is labeled with coordinates 1200000 and 2460579. The diagonal line is labeled KP081776.1. A cluster of squares is shown in the bottom right corner.

[illegible]
